# Supplementary material for: Frontoparietal paired associative stimulation versus single-site stimulation for generalized anxiety disorder: a pilot rTMS study
Source: PubMed Central journal article supplement — J Psychiatry Neurosci. 2022 Apr 27;47(2):E153–61. doi: 10.1503/jpn.210201 (PMC9259432; doi:10.1503/jpn.210201), 2022-04-27
Supplement: 210201-at-1.pdf [file 210201-at-1.pdf]

Appendix 1 to Wang L, Zhou Q, Wang K, et al. Frontoparietal paired associative stimulation versus single-site stimulation for generalized anxiety disorder: a pilot rTMS study. *J Psychiatry Neurosci* 2022. doi: 10.1503/jpn.210201. Copyright © 2022 The Author(s) or their employer(s). To receive this resource in an accessible format, please contact us at [cmajgroup@cmaj.ca](mailto:cmajgroup@cmaj.ca). Online appendices are unedited and posted as supplied by the authors.

## Fronto-parietal paired associative stimulation versus single-site stimulation for generalized anxiety disorder - a pilot rTMS study

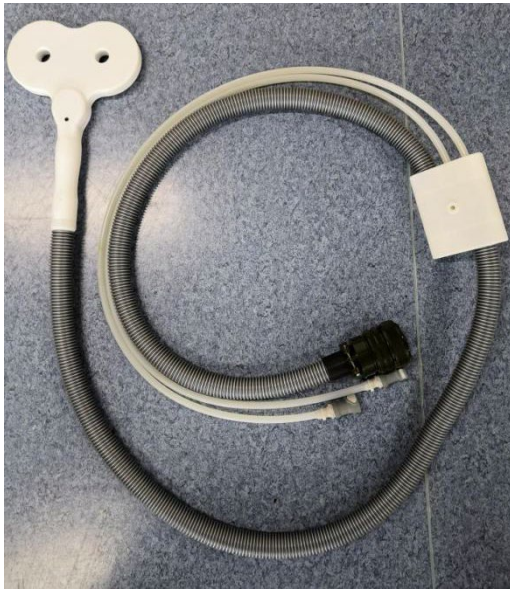

**Figure 1. Physical appearance of the coils.**

Coil number: ESWH8401; Coil racket structure size: width 191 mm; length 306 mm; thickness 19 mm. Coil cable length (including junction box) 2.5 m; Coil weight 0.9 kg.

Appendix 1 to Wang L, Zhou Q, Wang K, et al. Fronto-parietal paired associative stimulation versus single-site stimulation for generalized anxiety disorder - a pilot rTMS study. *J Psychiatry Neurosci* 2022. doi: 10.1503/jpn.210201 Copyright © 2022 The Author(s) or their employer(s). To receive this resource in an accessible format, please contact us at [cmajgroup@cmaj.ca](mailto:cmajgroup@cmaj.ca). Online appendices are unedited and posted as supplied by the authors.

Appendix 1 to Wang L, Zhou Q, Wang K, et al. Frontoparietal paired associative stimulation versus single-site stimulation for generalized anxiety disorder: a pilot rTMS study. *J Psychiatry Neurosci* 2022. doi: 10.1503/jpn.210201. Copyright © 2022 The Author(s) or their employer(s). To receive this resource in an accessible format, please contact us at [cmajgroup@cmaj.ca](mailto:cmajgroup@cmaj.ca). Online appendices are unedited and posted as supplied by the authors.

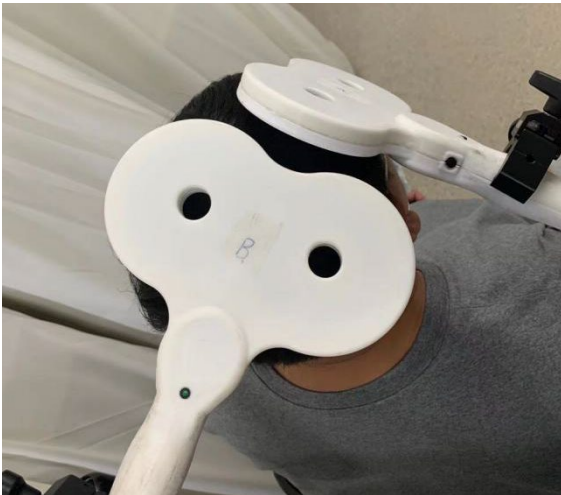

**Figure 2.** The coil placement on the head.

Appendix 1 to Wang L, Zhou Q, Wang K, et al. Fronto-parietal paired associative stimulation versus single-site stimulation for generalized anxiety disorder - a pilot rTMS study. *J Psychiatry Neurosci* 2022. doi: 10.1503/jpn.210201 Copyright © 2022 The Author(s) or their employer(s). To receive this resource in an accessible format, please contact us at [cmajgroup@cmaj.ca](mailto:cmajgroup@cmaj.ca). Online appendices are unedited and posted as supplied by the authors.

Appendix 1 to Wang L, Zhou Q, Wang K, et al. Frontoparietal paired associative stimulation versus single-site stimulation for generalized anxiety disorder: a pilot rTMS study. *J Psychiatry Neurosci* 2022. doi: 10.1503/jpn.210201. Copyright © 2022 The Author(s) or their employer(s). To receive this resource in an accessible format, please contact us at cmajgroup@cmaj.ca. Online appendices are unedited and posted as supplied by the authors.

**Table 1. Resting motor threshold for each subject.**

|        | rds-ccPAS-1500 group (N=13) | rds-ccPAS-750 group (N=9) | ss-PFC group (N=14) | ss-PPC group (N=14) |
|--------|-----------------------------|---------------------------|---------------------|---------------------|
| SUB-01 | 46                          | 41                        | 36                  | 45                  |
| SUB-02 | 42                          | 35                        | 41                  | 60                  |
| SUB-03 | 42                          | 34                        | 35                  | 52                  |
| SUB-04 | 39                          | 44                        | 40                  | 43                  |
| SUB-05 | 35                          | 45                        | 37                  | 49                  |
| SUB-06 | 35                          | 46                        | 43                  | 46                  |
| SUB-07 | 45                          | 40                        | 45                  | 38                  |
| SUB-08 | 37                          | 54                        | 42                  | 47                  |
| SUB-09 | 32                          | 34                        | 40                  | 46                  |
| SUB-10 | 50                          |                           | 45                  | 40                  |
| SUB-11 | 45                          |                           | 50                  | 39                  |
| SUB-12 | 43                          |                           | 48                  | 43                  |
| SUB-13 | 48                          |                           | 50                  | 44                  |
| SUB-14 |                             |                           | 41                  | 43                  |

Appendix 1 to Wang L, Zhou Q, Wang K, et al. Fronto-parietal paired associative stimulation versus single-site stimulation for generalized anxiety disorder - a pilot rTMS study. *J Psychiatry Neurosci* 2022. doi: 10.1503/jpn.210201 Copyright © 2022 The Author(s) or their employer(s). To receive this resource in an accessible format, please contact us at cmajgroup@cmaj.ca. Online appendices are unedited and posted as supplied by the authors.

Appendix 1 to Wang L, Zhou Q, Wang K, et al. Frontoparietal paired associative stimulation versus single-site stimulation for generalized anxiety disorder: a pilot rTMS study. *J Psychiatry Neurosci* 2022. doi: 10.1503/jpn.210201. Copyright © 2022 The Author(s) or their employer(s). To receive this resource in an accessible format, please contact us at cmajgroup@cmaj.ca. Online appendices are unedited and posted as supplied by the authors.

**Table 2. The GEE model for HAMA.**

| <b>GEE model</b>                  | <b>QICC</b> |
|-----------------------------------|-------------|
| Without covariates                | 6192.599    |
| With age as covariate             | 6653.319    |
| With gender as covariate          | 6122.831    |
| With age and gender as covariates | 6677.686    |

QICC: Corrected Quasi Likelihood under Independence Model Criterion (QICC).

Appendix 1 to Wang L, Zhou Q, Wang K, et al. Fronto-parietal paired associative stimulation versus single-site stimulation for generalized anxiety disorder - a pilot rTMS study. *J Psychiatry Neurosci* 2022. doi: 10.1503/jpn.210201 Copyright © 2022 The Author(s) or their employer(s). To receive this resource in an accessible format, please contact us at cmajgroup@cmaj.ca. Online appendices are unedited and posted as supplied by the authors.

**Table 3. Between-group differences with gender as covariate.**

| Adjusted difference             | Mean difference, p, difference (95% CI) |                              |                                |
|---------------------------------|-----------------------------------------|------------------------------|--------------------------------|
|                                 | post-treatment                          | 10-day follow up             | 1-month follow up              |
| <i>HAMA</i>                     |                                         |                              |                                |
| rds-ccPAS-1500 vs rds-ccPAS-750 | -6.36, 0.004**, (-10.68, -2.05)         | -3.47, 0.223, (-9.06, 2.11)  | -3.97, 0.213, (-10.21, 2.28)   |
| rds-ccPAS-1500 vs ss-PFC        | -6.81, 0.000**, (-10.14, -3.48)         | -4.10, 0.105, (-9.05, 0.86)  | -5.34, 0.057*, (-10.84, 0.16)  |
| rds-ccPAS-1500 vs ss-PPC        | -6.21**, 0.003**, (-10.28, -2.14)       | -3.14, 0.254, (-8.53, 2.25)  | -3.17, 0.247, (-8.52, 2.19)    |
| <i>HAMD</i>                     |                                         |                              |                                |
| rds-ccPAS-1500 vs rds-ccPAS-750 | -3.75, 0.035**, (-7.23, -0.27)          | -1.57, 0.437, (-5.54, 2.40)  | -2.35, 0.387, (-7.67, 2.97)    |
| rds-ccPAS-1500 vs ss-PFC        | -4.33, 0.003**, (-7.17, -1.49)          | -2.34, 0.152, (-5.54, 0.86)  | -3.20, 0.094*, (-6.94, 0.54)   |
| rds-ccPAS-1500 vs ss-PPC        | -3.41, 0.027*, (-6.43, -0.38)           | -1.20, 0.544, (-5.09, 2.68)  | -1.99, 0.317, (-5.88, 1.90)    |
| <i>PSQI</i>                     |                                         |                              |                                |
| rds-ccPAS-1500 vs rds-ccPAS-750 | -1.75, 0.252, (-4.74, 1.24)             | -0.64, 0.717, (-4.07, 2.80)  | -1.60, 0.371, (-5.11, 1.91)    |
| rds-ccPAS-1500 vs ss-PFC        | -3.14, 0.062*, (-6.44, 0.16)            | -2.50, 0.132, (-5.75, 0.75)  | -2.65, 0.102*, (-5.83, 0.53)   |
| rds-ccPAS-1500 vs ss-PPC        | -3.74, 0.010**, (-6.57, -0.90)          | -3.02, 0.059*, (-6.16, 0.11) | -3.17, 0.045**, (-6.27, -0.07) |

rds-ccPAS: repetitive dual-site paired associative stimulation; \*\*: Significant difference (p<0.05). \*: Trend-level difference (p<0.1). Degree of freedom is 1.

**Table 4. Between-group differences with age and gender as covariates.**

| Adjusted difference             | Mean difference, p, 95% CI      |                              |                                |
|---------------------------------|---------------------------------|------------------------------|--------------------------------|
|                                 | post-treatment                  | 10-day follow up             | 1-month follow up              |
| <i>HAMA</i>                     |                                 |                              |                                |
| rds-ccPAS-1500 vs rds-PAS-750   | -6.43, 0.003**, (-10.69, -2.17) | -3.54, 0.210, (-9.07, 1.99)  | -4.04, 0.200, (-10.21, 2.14)   |
| rds-ccPAS-1500 vs ss-PFC        | -6.90, 0.000**, (-10.63, -3.17) | -4.18, 0.117, (-9.41, 1.04)  | -5.43, 0.066*, (-11.22, 0.37)  |
| rds-ccPAS-1500 vs ss-PPC        | -6.51, 0.003**, (-10.84, -2.18) | -3.44, 0.222, (-8.95, 2.07)  | -3.47, 0.221, (-9.01, 2.08)    |
| <i>HAMD</i>                     |                                 |                              |                                |
| rds-ccPAS-1500 vs rds-ccPAS-750 | -3.66, 0.038**, (-7.13, -0.20)  | -1.48, 0.456, (-5.38, 2.41)  | -2.27, 0.397, (-7.49, 2.97)    |
| rds-ccPAS-1500 vs ss-PFC        | -4.30, 0.005**, (-7.28, -1.32)  | -2.31, 0.167, (-5.59, 0.97)  | -3.17, 0.108, (-7.03, 0.70)    |
| rds-ccPAS-1500 vs ss-PPC        | -3.51, 0.033**, (-6.73, -0.29)  | -1.31, 0.513, (-5.38, 2.61)  | -2.09, 0.308, (-6.11, 1.93)    |
| <i>PSQI</i>                     |                                 |                              |                                |
| rds-ccPAS-1500 vs rds-ccPAS-750 | -1.74, 0.262, (-4.77, 1.30)     | -0.63, 0.725, (-4.11, 2.86)  | -1.59, 0.382, (-5.16, 1.98)    |
| rds-ccPAS-1500 vs ss-PFC        | -3.13, 0.066*, (-6.47, 0.20)    | -2.49, 0.138, (-5.79, 0.80)  | -2.64, 0.108*, (-5.86, 0.58)   |
| rds-ccPAS-1500 vs ss-PPC        | -3.72, 0.012**, (-6.63, -0.80)  | -3.00, 0.069*, (-6.24, 0.24) | -3.15, 0.054**, (-6.35, -0.05) |

rds-ccPAS: repetitive dual-site paired associative stimulation; \*\*: Significant difference (p<0.05). \*: Trend-level difference (p<0.1). Degree of freedom is 1.
